# Supplementary material for: Neurophysiological consequences of synapse loss in progressive supranuclear palsy
Source: PubMed Central journal article supplement (PMC10232290; doi:10.1093/brain/awac471), 2022-12-14
Supplement: awac471_supplementary_data.pdf [file awac471_supplementary_data.pdf]

Supplementary Table 1. Demographics and test scores.

Averaged demographic and cognitive data for participants. The mean is shown followed by the standard deviation in brackets.

Supplementary Table 2. Initial model parameters.

The initial mean values of notable model parameters and their variance.

Supplementary Table 3. Subject specific model parameters.

The effect of [11C]UCB-J, FAB and Ymax on connections in the CMC network as summarised in figure 5A and C, in terms of mean parameter values before and after Bayesian Model Averaging, and the posterior probability after Bayesian Model Averaging.

**Supplementary Table 1: Demographics and test scores**

|                              |             |
|------------------------------|-------------|
| M:F                          | 6:5         |
| Age                          | 67.5 (10.2) |
| Education (years)            | 11.2 (1.5)  |
| ACE-R Total (max=100)        | 85.6 (6.5)  |
| MMSE (max=30)                | 28.1 (1.4)  |
| Attention (max=18)           | 17.6 (0.5)  |
| Memory (max=26)              | 22.5 (3.6)  |
| Fluency (max=14)             | 6.5 (3.0)   |
| Language (max=26)            | 24.2 (1.3)  |
| Visuospatial (max=16)        | 14.8 (1.2)  |
| FAB (max=18)                 | 14.1 (2.5)  |
| INECO Total (max=30)         | 19.9 (2.5)  |
| Graded Naming: # correct     | 19.8 (3.8)  |
| Graded Naming: # errors      | 10.2 (3.8)  |
| PSPRS (max=100)              | 24.6 (10.0) |
| Hayling Total scaled scores  | 14.8 (3.4)  |
| Hayling overall scaled score | 4.4 (1.7)   |
| CBI Total (max=180)          | 40.4 (25.7) |
| FRS Percentage               | 55.1 (29.1) |

**Supplementary Table 2: Initial model parameters.**

| Parameter grouping           | Specific parameter          | Default value | Prior Variance |
|------------------------------|-----------------------------|---------------|----------------|
| Hyperparameter               | Precision of the noise      | 4             | 1/100          |
| Cell influence on dipole     | Stellate (J)                | 0.2           | 1/45           |
|                              | Superficial pyramidal (J)   | 0.8           | 1/45           |
|                              | Superficial interneuron(J)  | 0             | 1/80           |
|                              | Deep pyramidal (J)          | 0.2           | 1/45           |
|                              | Deep interneuron (J)        | 0             | 1/80           |
|                              | Thalamic projection (J)     | 0.2           | 1/45           |
|                              | Leadfields                  | 1             | 1/45           |
| Network connection gains     | Intrinsic gains             | 1             | 1/8            |
|                              | Extrinsic gains             | 1             | 1/8            |
| Decay constants, $\tau$ (ms) | AMPA $\tau$                 | 4             | 0              |
|                              | NMDA $\tau$                 | 100           | 0              |
|                              | GABAA $\tau$                | 16            | 0              |
|                              | GABAB $\tau$                | 200           | 0              |
|                              | M-current $\tau$            | 160           | 0              |
|                              | H-current $\tau$            | 100           | 0              |
| Miscellaneous strengths      | K + leak G                  | 1             | 0              |
|                              | Background V                | 2.17          | 0              |
| Reversal potentials (mV)     | Na <sup>2+</sup> + reversal | 60            | 0              |
|                              | Ca <sup>2+</sup> + reversal | 10            | 0              |
|                              | Cl reversal                 | -90           | 0              |
|                              | K + reversal                | -70           | 0              |
|                              | IH reversal                 | -100          | 0              |
| Firing threshold (mV)        | VT (all pops)               | -40           | 0              |
| Firing precision             | VX (all pops)               | 1             | 0              |
| IHI-V slope                  | VHX                         | 300           | 0              |
| Cell Capacitances (pF)       | Stellate (C)                | 200           | 0              |
|                              | Superficial pyramidal (C)   | 150           | 0              |
|                              | Superficial interneuron(C)  | 50            | 0              |
|                              | Deep pyramidal (C)          | 400           | 0              |
|                              | Deep interneuron (C)        | 50            | 0              |
|                              | Thalamic projection (C)     | 200           | 0              |
| Delays (ms)                  | Intrinsic                   | 2             | 0              |
|                              | Extrinsic cortico-cortical  | 16            | 0              |
|                              | Extrinsic thalamo-cortical  | 80            | 0              |

**Supplementary Table 3: Subject specific model parameters.**

| <b>UCBJ</b>       |          |                       |                        |                               |
|-------------------|----------|-----------------------|------------------------|-------------------------------|
| <i>Connection</i> |          | <i>Mean (pre-BMA)</i> | <i>mean (post-BMA)</i> | <i>Probability (post-BMA)</i> |
| AMPA              | ss -> sp | -0.2                  | -0.16                  | 0.88                          |
| AMPA              | ss -> si | -0.1                  | 0                      | 0.2                           |
| AMPA              | sp -> si | -0.08                 | 0                      | 0.2                           |
| NMDA              | ss -> sp | 0.73                  | 0.59                   | 0.86                          |

| <b>FAB</b>        |          |                       |                        |                               |
|-------------------|----------|-----------------------|------------------------|-------------------------------|
| <i>Connection</i> |          | <i>Mean (pre-BMA)</i> | <i>mean (post-BMA)</i> | <i>Probability (post-BMA)</i> |
| AMPA              | ss -> sp | -0.5                  | -0.34                  | 0.99                          |
| AMPA              | ss -> si | -0.22                 | 0                      | 0.31                          |
| AMPA              | sp -> si | 0.24                  | 0                      | 0.37                          |
| NMDA              | ss -> sp | 1.35                  | 1.48                   | 0.92                          |

| <b>Ymax</b>       |          |                       |                        |                               |
|-------------------|----------|-----------------------|------------------------|-------------------------------|
| <i>Connection</i> |          | <i>Mean (pre-BMA)</i> | <i>mean (post-BMA)</i> | <i>Probability (post-BMA)</i> |
| AMPA              | ss -> sp | -0.04                 | 0                      | 0.12                          |
| AMPA              | ss -> si | 0.02                  | 0                      | 0.13                          |
| AMPA              | sp -> si | -0.44                 | -0.46                  | 1                             |
| NMDA              | ss -> sp | 0.88                  | 0.86                   | 0.96                          |
